1 **PP2A<sup>B55δ</sup> Responsible for the High Initial Rates of Alcoholic Fermentation in Sake**  
2 **Yeast Strains of *Saccharomyces cerevisiae***

3

4 Daisuke Watanabe,<sup>a,b#</sup> Takuma Kajihara,<sup>a</sup> Yukiko Sugimoto,<sup>a</sup> Kenichi Takagi,<sup>a</sup> Megumi  
5 Mizuno,<sup>b</sup> Yan Zhou,<sup>b</sup> Jiawen Chen,<sup>c</sup> Kojiro Takeda,<sup>d,e</sup> Hisashi Tatebe,<sup>a</sup> Kazuhiro  
6 Shiozaki,<sup>a</sup> Nobushige Nakazawa,<sup>f</sup> Shingo Izawa,<sup>g</sup> Takeshi Akao,<sup>b</sup> Hitoshi Shimoi,<sup>b,h</sup>  
7 Tatsuya Maeda,<sup>c\*</sup> Hiroshi Takagi<sup>a</sup>

8

9 <sup>a</sup>Division of Biological Science, Graduate School of Science and Technology, Nara  
10 Institute of Science and Technology, Ikoma, Nara, Japan

11 <sup>b</sup>National Research Institute of Brewing, Higashihiroshima, Hiroshima, Japan

12 <sup>c</sup>Institute of Molecular and Cellular Biosciences, the University of Tokyo, Tokyo, Japan

13 <sup>d</sup>Department of Biology, Faculty of Science and Engineering, Konan University, Kobe,  
14 Japan

15 <sup>e</sup>Institute for Integrative Neurobiology, Konan University, Kobe, Japan

16 <sup>f</sup>Department of Biotechnology, Faculty of Bioresource Science, Akita Prefectural  
17 University, Akita, Akita, Japan

18 <sup>g</sup>Graduate School of Science and Technology, Kyoto Institute of Technology, Kyoto,  
19 Japan.

20 <sup>h</sup>Faculty of Agriculture, Iwate University, Morioka, Iwate, Japan

21

22 Running title: PP2A<sup>B55δ</sup> Drives Alcoholic Fermentation in Yeast

23

- 24 #Address correspondence to Daisuke Watanabe, [d-watanabe@bs.naist.jp](mailto:d-watanabe@bs.naist.jp).
- 25 \*Present address: Tatsuya Maeda, Department of Biology, Hamamatsu University School  
26 of Medicine, Hamamatsu, Shizuoka, Japan.

27 **ABSTRACT**

28 Sake yeast strain Kyokai no. 7 (K7) and its *Saccharomyces cerevisiae* relatives carry a  
29 homozygous loss-of-function mutation in the *RIM15* gene, which encodes a  
30 Greatwall-family protein kinase. Disruption of *RIM15* in non-sake yeast strains leads to  
31 improved alcoholic fermentation, indicating that the defect in Rim15p is associated with  
32 the enhanced fermentation performance of sake yeast cells. In order to understand how  
33 Rim15p mediates fermentation control, we here focused on target-of-rapamycin protein  
34 kinase complex 1 (TORC1) and protein phosphatase 2A with the B55 $\delta$  regulatory subunit  
35 (PP2A<sup>B55 $\delta$</sup> ), complexes that are known to act upstream and downstream of Rim15p,  
36 respectively. Several lines of evidence, including our previous transcriptomic analysis  
37 data, suggested enhanced TORC1 signaling in sake yeast cells during sake fermentation.  
38 Fermentation tests of the TORC1-related mutants using a laboratory strain revealed that  
39 TORC1 signaling positively regulates the initial fermentation rate in a Rim15p-dependent  
40 manner. Deletion of the *CDC55* gene encoding B55 $\delta$  abolished the high fermentation  
41 performance of Rim15p-deficient laboratory yeast and sake yeast cells, indicating that  
42 PP2A<sup>B55 $\delta$</sup>  mediates the fermentation control by TORC1 and Rim15p. The  
43 TORC1-Greatwall-PP2A<sup>B55 $\delta$</sup>  pathway similarly affected the fermentation rate in the  
44 fission yeast *Schizosaccharomyces pombe*, strongly suggested that the evolutionarily  
45 conserved pathway governs alcoholic fermentation in yeasts. It is likely that elevated  
46 PP2A<sup>B55 $\delta$</sup>  activity accounts for the high fermentation performance of sake yeast cells.  
47 Heterozygous loss-of-function mutations in *CDC55* found in K7-related sake strains may  
48 indicate that the Rim15p-deficient phenotypes are disadvantageous to cell survival.  
49

50 **IMPORTANCE**

51 The biochemical processes and enzymes responsible for glycolysis and alcoholic  
52 fermentation by the yeast *S. cerevisiae* have long been the subject of scientific research.  
53 Nevertheless, the factors determining fermentation performance *in vivo* are not fully  
54 understood. As a result, the industrial breeding of yeast strains has required empirical  
55 characterization of fermentation by screening numerous mutants through laborious  
56 fermentation tests. To establish a rational and efficient breeding strategy, key regulators  
57 of alcoholic fermentation need to be identified. In the present study, we focused on how  
58 sake yeast strains of *S. cerevisiae* have acquired high alcoholic fermentation performance.  
59 Our findings provide a rational molecular basis to design yeast strains with optimal  
60 fermentation performance for production of alcoholic beverages and bioethanol. In  
61 addition, as the evolutionarily conserved TORC1-Greatwall-PP2A<sup>B55δ</sup> pathway plays a  
62 major role in the glycolytic control, our work may contribute to research on carbohydrate  
63 metabolism in higher eukaryotes.

64

65 **KEYWORDS**

66 Alcoholic fermentation, TORC1, Greatwall, Rim15p, PP2A<sup>B55δ</sup>, Cdc55p, sake yeast,  
67 *Saccharomyces cerevisiae*, *Schizosaccharomyces pombe*

68 **INTRODUCTION**

69 Sake, an alcoholic beverage made from fermented rice, typically has a higher alcohol  
70 content than beer or wine. During sake fermentation, saccharification by hydrolytic  
71 enzymes of *Aspergillus oryzae* and alcoholic fermentation by *Saccharomyces cerevisiae*  
72 sake yeast are the major bioconversions. Thus, the high alcohol content of sake is at least  
73 partly attributable to the unique characteristics of sake yeast. Sake yeast strains have long  
74 been selected based on the high fermentation performance, as well as the balanced  
75 production of aroma and flavor compounds (1, 2). Our previous comparative genomic  
76 and transcriptomic analyses revealed that a representative sake yeast, strain Kyokai no. 7  
77 (K7), and its relatives carry a loss-of-function mutation in *RIM15* (*rim15*<sup>5054\_5055insA</sup>), a  
78 gene of a highly conserved Greatwall-family protein kinase (3–5). Disruption of the  
79 *RIM15* gene in non-sake yeast strains, such as laboratory, beer, and bioethanol strains,  
80 leads to an increase in the fermentation rate (5–9), demonstrating that Rim15p inhibits  
81 alcoholic fermentation. Thus, the *rim15*<sup>5054\_5055insA</sup> mutation appears to be associated with  
82 the enhanced fermentation property of K7. Nevertheless, this loss-of-function mutation  
83 cannot be solely responsible for the sake yeast's improved fermentation, because  
84 expression of the functional *RIM15* gene does not suppress alcoholic fermentation in K7  
85 (5). To better understand this phenomenon, the Rim15p-mediated fermentation control  
86 needs to be further dissected through comparative analysis between sake and non-sake  
87 yeast strains.

88 While Rim15p has been identified as a key inhibitor of alcoholic fermentation,  
89 involvement of the upstream regulators of Rim15p (Fig. S1) in fermentation control has  
90 not yet been fully examined. In *S. cerevisiae*, Rim15p activity is under the control of

91 several nutrient-sensing signaling protein kinases, including protein kinase A (PKA), the  
92 phosphate-sensing cyclin and cyclin-dependent protein kinase (CDK) complex termed  
93 Pho80p-Pho85p, and target-of-rapamycin protein kinase complex 1 (TORC1) (10, 11).  
94 Thus, inactivation of these kinases under nutrient starvation or other stress conditions  
95 may trigger Rim15p-dependent inhibition of alcoholic fermentation. Activation of  
96 TORC1 is mediated by the heterodimeric Rag GTPases (Gtr1p-Gtr2p in *S. cerevisiae*),  
97 which are negatively regulated by the Seh1p-associated protein complex inhibiting  
98 TORC1 (SEACIT) subcomplex (Iml1p-Npr2p-Npr3p in *S. cerevisiae*) that acts as a  
99 GTPase-activating protein for Gtr1p (12–14). Active TORC1 phosphorylates multiple  
100 targets including Sch9p, the yeast orthologue of the mammalian serum and  
101 glucocorticoid-regulated kinase (SGK) (15). Direct phosphorylation of Rim15p at  
102 Ser1061 by Sch9p contributes to sequestration of Rim15p in the cytoplasm, thereby  
103 inhibiting Rim15p functions (16). Recently, it was reported that the  
104 TORC1-Sch9p-Rim15p pathway is conserved and present in the evolutionarily distant  
105 fission yeast *Schizosaccharomyces pombe* (17), although it remains to be determined if  
106 the pathway affects the fermentation performance in this yeast species. In contrast,  
107 mammalian TORC1 (mTORC1) positively regulates glycolysis by the induction of  
108 glycolytic gene expression through hypoxia-inducible factor 1 $\alpha$  (HIF1 $\alpha$ ) (18).

109 In *S. cerevisiae*, Rim15p targets the redundant transcription factors Msn2p and  
110 Msn4p (Msn2/4p) to mediate entry into the quiescent state (19, 20). In the context of  
111 fermentation control, Rim15p and Msn2/4p are required for the transcriptional induction  
112 of the UDP-glucose pyrophosphorylase-encoding gene *UGPI*, which switches the mode  
113 of glucose metabolism from glycolysis (a catabolic mode) to UDP-glucose synthesis (an

114 anabolic mode) (7). However, no orthologue of Msn2/4p has been found in other  
115 organisms, and the role of the Greatwall-family protein kinases in carbohydrate  
116 metabolism is unknown in *S. pombe* or higher eukaryotes. The Greatwall protein kinase  
117 was originally identified as a potential cell cycle activator in *Drosophila* (21). In animals,  
118 Greatwall directly phosphorylates a small protein called  $\alpha$ -endosulfine (ENSA), which  
119 inhibits the activity of protein phosphatase 2A accompanied by a regulatory subunit B55 $\delta$   
120 (PP2A<sup>B55 $\delta$</sup> ) (22, 23). Due to the antimitotic activity of PP2A<sup>B55 $\delta$</sup> , Greatwall is required for  
121 maintenance of mitosis. More recently, the Greatwall-ENSA-PP2A<sup>B55 $\delta$</sup>  pathway was  
122 reported to be conserved in *S. cerevisiae*; Rim15p phosphorylates ENSA orthologues  
123 Igo1/2p to inhibit PP2A with the Cdc55p regulatory subunit (24–26). The orthologous  
124 pathway has also been found in *S. pombe* and it plays a pivotal role in TORC1-mediated  
125 cell cycle control (17). However, to our knowledge, the effect of PP2A<sup>B55 $\delta$</sup>  on  
126 fermentation performance has not previously been described.

127         In the present study, we tested whether the TORC1-Greatwall-PP2A<sup>B55 $\delta$</sup>  pathway  
128 participates in the control of alcoholic fermentation in *S. cerevisiae* and *S. pombe*. Our  
129 results provide new insights into how yeast cells determine the mode of glucose  
130 metabolism, especially in the context of the enhanced fermentation performance of sake  
131 yeast strains.

132

## 133 **RESULTS**

134 **TORC1-associated transcriptomic profiles during alcoholic fermentation in**  
135 **laboratory and sake yeast strains.** Our previous comparative transcriptomic analysis  
136 indicated that the expression of the Rim15p- and Msn2/4p-targeted genes was attenuated

137 in K701 (a strain derived from K7) compared to that in the laboratory strain X2180 early  
138 in a 20-d sake fermentation test (3). This may be attributed not only to the sake  
139 yeast-specific loss-of-function mutation in the *RIM15* gene (*rim15*<sup>5054\_5055insA</sup>; see also ref.  
140 5), but also to higher TORC1 activity in the sake strains. TORC1 activity induces the  
141 ribosomal genes and the ribosome biogenesis genes, while it represses the nitrogen  
142 catabolite repression (NCR) and general amino acid control (GAAC) genes, as well as the  
143 Rim15p- and Msn2/4p-dependent stress-response genes (27) (Fig. S1). We found that  
144 these transcriptomic traits under the control of TORC1 are coordinated in common during  
145 sake fermentation. Although the Sfp1p-targeted genes encoding the ribosome-associated  
146 proteins in X2180 were rapidly downregulated during the progression of alcoholic  
147 fermentation, K701 cells maintained higher levels of these mRNAs at the initial stage of  
148 fermentation (Fig. 1A). Whereas the NCR and GAAC genes in X2180 were transiently  
149 upregulated early in sake fermentation, this transcriptional induction was not observed in  
150 K701 (Fig. 1B). Together, these data suggested that inactivation of TORC1 after the onset  
151 of alcoholic fermentation leads to attenuation of the Sfp1p-targeted gene expression and  
152 induction of the NCR and GAAC regulons in X2180. This phenomenon was less clearly  
153 observed in K701, implying a slower decline in TORC1 activity during the initial stage of  
154 alcoholic fermentation by K701.

155 To directly monitor TORC1 activity, an antibody against phospho-Thr737 of  
156 Sch9p (28) was used, as this TORC1-dependent phosphorylation of Sch9p is known to  
157 mediate signaling to Rim15p. Laboratory yeast and K701-lineage sake yeast cells  
158 engineered to overexpress 3HA-tagged Sch9p from a glycolytic gene promoter were  
159 sampled during alcoholic fermentation in YPD20 medium. The sake strain exhibited a



160 higher rate of carbon dioxide emission and completed alcoholic fermentation more  
161 rapidly than the laboratory strain (Fig. S2A). Phosphorylation of Sch9p Thr737 was  
162 detected only at the initial stage (at 6 h from the onset of alcoholic fermentation), and was  
163 more prominent in the sake strain than in the laboratory strain (Fig. S2B). The signals  
164 decayed quickly over time in both strains, suggesting that TORC1 activity is highest at  
165 the onset of alcoholic fermentation. It should be noted that the glycolytic promoter used  
166 in this study was inactivated after the completion of logarithmic phase (> 12 - 24 h) and  
167 3HA-Sch9p was expressed only at low levels after 2 days.

168 **Effects of the TORC1-Greatwall-PP2A<sup>B55δ</sup> pathway on fermentation**  
169 **performance.** In *S. cerevisiae* laboratory strains, loss of Rim15p leads to an increase in  
170 the initial rate of carbon dioxide emission during alcoholic fermentation (5, 7) (Fig. 2A).  
171 To examine whether TORC1 acts as a negative regulator of Rim15p activity in  
172 fermentation control, we tested the effect of altered TORC1 signaling on fermentation  
173 performance in a laboratory strain. Addition of a low concentration (1 nM) of the TORC1  
174 inhibitor rapamycin to the medium led to a decrease in the rate of carbon dioxide  
175 emission from 1.5 d to 4 d (Fig. 2B). Since cell growth was not severely affected by 1 nM  
176 rapamycin (data not shown), the observed attenuation of carbon dioxide production was  
177 most likely indicative of reduced cellular fermentation performance. Deletion of the  
178 *TOR1* gene, which encodes a nonessential catalytic subunit of TORC1, also decreased  
179 carbon dioxide emission from 1.5 d to 3.5 d (Fig. 2C). Deletion of *TOR2*, which encodes  
180 a second TOR kinase that can also serve as a catalytic subunit of TORC1, was not tested  
181 in this study because Tor2p is essential for cell viability in *S. cerevisiae*. In contrast, the  
182 hyperactive *TOR1* and *TOR2* alleles (*TOR1*<sup>L2134M</sup> and *TOR2*<sup>L2138M</sup>) (28) increased carbon

183 dioxide emission around 1 d to 2 d (Figs. 2D and E). Strains harboring either of these  
184 hyperactive alleles exhibited drastic decreases in the rate of carbon dioxide emission  
185 toward the end of the fermentation tests. These results suggested that TORC1 activity  
186 correlates with fermentation performance during the initial stage of the process. Indeed,  
187 deletion of *GTR1* or *GTR2*, activators of TORC1 signaling, decreased carbon dioxide  
188 emission (Figs. 2F and G). In addition, disruption of *NPR2* or *NPR3*, which encode the  
189 components of the SEACIT subcomplex that inhibit TORC1 signaling, resulted in  
190 increased carbon dioxide emission around 1.5 d to 2 d (Figs. 2H and I), corroborating the  
191 role of TORC1 as a positive regulator of alcoholic fermentation. On the other hand, loss  
192 of Sch9p, which mediates signaling between TORC1 and Rim15p (Fig. S1), markedly  
193 decreased carbon dioxide emission (Fig. 2J).

194         Next, the effects of TORC1 on fermentation performance were examined in the  
195 Rim15p-deficient strains. In *rim15Δ* cells of the laboratory strain, 1 nM rapamycin did  
196 not affect carbon dioxide emission (Fig. 2K). We confirmed that the growth of *rim15Δ*  
197 cells was not affected by 1 nM rapamycin (data not shown). In the *rim15Δ* background,  
198 the hyperactive *TOR1*<sup>L2134M</sup> allele did not increase the initial rate of carbon dioxide  
199 emission (1 - 2 d), but caused a decrease in the later stage of fermentation (> 3 d) (Fig.  
200 2L). These data suggested that Rim15p is required for the TORC1-triggered fermentation  
201 control, specifically in the early stage of alcoholic fermentation. Thus, it was predicted  
202 that the fermentation performance of the sake strain defective in Rim15p is not affected  
203 by TORC1 signaling. As expected, deletion of the *GTR1* or *SCH9* genes in the sake strain  
204 did not change the maximum rate of carbon dioxide emission (Figs. 2M and N), although  
205 alcoholic fermentation was slightly delayed in both cases, probably due to slower cell

206 growth. We also assessed whether the conserved TORC1-Greatwall pathway affects  
207 fermentation performance in the fission yeast *S. pombe*. As observed in budding yeast, an  
208 activated allele of *tor2*<sup>+</sup>, *tor2*<sup>E2221K</sup> (29), brought about increased carbon dioxide emission  
209 in fission yeast (Fig. 2O). Furthermore, deletion of the redundant Sch9p-orthologous  
210 genes, *sck1*<sup>+</sup> and *sck2*<sup>+</sup>, resulted in decreased carbon dioxide emission (Fig. 2P).

211 Does Greatwall-triggered signaling to PP2A<sup>B55δ</sup> play a role in the control of  
212 alcoholic fermentation? Deletion of the redundant ENSA-encoding genes *IGO1* and  
213 *IGO2* (*IGO1/2*), which mediate the signaling between Greatwall and PP2A<sup>B55δ</sup> in *S.*  
214 *cerevisiae* (Fig. S1), led to an increased rate of carbon dioxide emission, as did deletion  
215 of *RIM15* (Figs. 3A and B). Similarly, in *S. pombe*, both the *cek1Δ ppk18Δ* and *igo1Δ*  
216 strains, which lack Greatwall and ENSA, respectively (17), exhibited higher rates of  
217 carbon dioxide emission than did the wild type (Figs. 3C and D). PP2A is a heterotrimeric  
218 enzyme complex composed of structural (A), regulatory (B), and catalytic (C) subunits.  
219 In budding yeast, the loss of both C subunit-encoding genes *PPH21* and *PPH22* leads to  
220 cell death, but disruption of either gene alone only weakly decreased carbon dioxide  
221 emission (Figs. 3E and F). In addition, deletion of the A subunit-encoding *TPD3* gene  
222 inhibited alcoholic fermentation (Fig. 3G). Moreover, deletion of *CDC55*, which encodes  
223 a B55δ-family regulatory subunit, severely decreased the rate of carbon dioxide emission  
224 throughout the duration of fermentation, whereas deletion of *RTS1* that encodes a  
225 B56-family regulatory subunit promoted alcoholic fermentation (Figs. 3H and I). In *S.*  
226 *pombe*, loss of the *ppa1*<sup>+</sup> or *ppa2*<sup>+</sup> gene, which encode C subunit isoforms, did not appear  
227 to affect alcoholic fermentation; however, loss of the *pab1*<sup>+</sup> gene encoding a B55δ  
228 subunit impaired alcoholic fermentation (Figs. 3J–L). Together, these data suggested that

229 the Greatwall-ENSA-PP2A<sup>B55δ</sup> pathway is involved in the control of alcoholic  
230 fermentation in both *S. cerevisiae* and *S. pombe*. When combined with the Greatwall or  
231 ENSA defects, deletion of the *CDC55* (*S. cerevisiae*) or *pab1*<sup>+</sup> (*S. pombe*) genes almost  
232 fully canceled high fermentation performance (Figs. 3M–O). Thus, PP2A<sup>B55δ</sup> is likely the  
233 major target of Greatwall and ENSA in the control of alcoholic fermentation in both  
234 yeasts.

235 Consistent with a previous report (5), expression of the functional *RIM15* gene  
236 derived from a laboratory strain did not attenuate alcoholic fermentation in the sake strain  
237 (Fig. 3P). Therefore, we next evaluated the role of PP2A<sup>B55δ</sup> downstream of Rim15p in  
238 the high fermentation performance of sake yeast cells. Interestingly, we found that the  
239 diploid sake strain K701 is heterozygous for the deletion of a single adenine nucleotide at  
240 position 1092 of the *CDC55* gene (designated the *cdc55*<sup>MT</sup> allele), resulting in a  
241 frameshift and premature polypeptide termination (Fig. 4A); thus, K701 carries only one  
242 functional *CDC55* allele (designated the *CDC55*<sup>WT</sup> allele). To directly test the role of  
243 PP2A<sup>B55δ</sup> in the sake yeast, the K701 strain was mutagenized by introduction of a  
244 *CDC55*-disrupting construct, yielding 12 heterozygous disruptants. Direct sequencing of  
245 the *CDC55* loci amplified from genomic DNA revealed that the *cdc55*<sup>MT</sup> allele was  
246 disrupted in six of the heterozygous disruptants, while the *CDC55*<sup>WT</sup> allele was disrupted  
247 in the other six heterozygous disruptants. The former class, in which the *CDC55*<sup>WT</sup> allele  
248 remains intact, exhibited fermentation characteristics similar to the parental K701 strain  
249 (Fig. 3Q), while the latter class with no functional *CDC55* gene exhibited markedly lower  
250 carbon dioxide emission, especially in the initial stage of fermentation (0.5 - 2 d) (Fig.  
251 3R). These results indicated that the *CDC55*<sup>WT</sup> allele is required for the high fermentation

252 performance of the K701 sake yeast strain.

253 **Heterozygous nonsense or frameshift mutations in the *CDC55* gene of the**  
254 **sake yeast strains.** As mentioned above, we identified a heterozygous loss-of-function  
255 mutation (*cdc55*<sup>1092delA</sup>) in diploid K701 (Fig. 4A). To test whether this mutation is  
256 conserved among the sake strains, we analyzed the sequence of the *CDC55* genes in 17  
257 K7-related Kyokai sake strains, including K6, K601, K7, K701, K9, K901, K10, K1001,  
258 K11, K12, K13, K14, K1401, K1501, K1601, K1701, and K1801 [Note that the  
259 numbering corresponds to the sequential isolation of these strains. The “-01” suffix is  
260 used to indicate foamless variants that do not generate thick foam layers during sake  
261 fermentation; for instance, K701 is the foamless variant of K7 (30).]. As shown in Fig. 4B,  
262 the *cdc55*<sup>1092delA</sup> mutation is unique to K701, and 65% (11 of 17) of the tested strains  
263 contain other nonsense or frameshift mutations in the open reading frame of the *CDC55*  
264 gene. Notably, the three most recently isolated strains, K1601, K1701, and K1801, have  
265 neither a nonsense mutation nor a frameshift mutation in this locus. Although there are a  
266 few lineage-specific mutations, such as *cdc55*<sup>C793T</sup> in K10 and K1001 and *cdc55*<sup>351\_352insA</sup>  
267 in K7 and K1501 (2), closely associated strains do not always contain the same mutation  
268 (e.g., K6 versus K601, K7 versus K701, or K7 versus K11). Each year, every Kyokai sake  
269 yeast strain was selected from clone stocks before distribution by the Brewing Society of  
270 Japan; notably, the K7 strains from three different years (1970, 1972, and 1974) carry  
271 distinct *cdc55* mutations. The K7 strain used for whole-genome analysis (4) harbors a  
272 *cdc55* mutation identical to the *cdc55*<sup>1571delC</sup> allele in K7\_1970. Thus, it appears that most  
273 of the *cdc55* mutations represent independent events that occurred after the establishment  
274 of the individual sake strains. While the *cdc55*<sup>1571delC</sup> mutation in K7\_1974 results in

275 additional 27 amino acid residues at the carboxyl terminus of the encoded protein, each of  
276 the other frameshift mutations leads to a premature stop codon that truncates the carboxyl  
277 terminus. Since all of the identified mutations are heterozygous, the effects of the *cdc55*  
278 loss-of-function mutations may be masked by the functional *CDC55* allele, as observed in  
279 K701.

### 280 **Effects of PP2A<sup>B55 $\delta$</sup> on the intracellular levels of glycolytic intermediates.**

281 Since PP2A<sup>B55 $\delta$</sup>  dephosphorylates many cellular substrates (31), it is difficult to infer how  
282 PP2A<sup>B55 $\delta$</sup>  controls alcoholic fermentation. However, it may be worth examining whether  
283 PP2A<sup>B55 $\delta$</sup>  regulates the activities of carbon metabolic enzymes through protein  
284 dephosphorylation as several recent studies have shed light on posttranslational  
285 modification as regulatory mechanisms for metabolic flux *in vivo* (32, 33). In the present  
286 study, we adopted a metabolomic approach to explore the glycolytic reactions that may  
287 be affected by the loss of PP2A<sup>B55 $\delta$</sup>  function. Metabolites were extracted from cells  
288 sampled at the early stages (6 h, 1 d, or 2 d) of alcoholic fermentation in YPD20 medium.  
289 Relative metabolite levels at 6 h indicated that the pools of early glycolytic intermediates  
290 [glucose 6-phosphate (G6P), fructose 6-phosphate (F6P), fructose 1,6-bisphosphate  
291 (F1,6BP), and dihydroxyacetone phosphate (DHAP)] were slightly increased by deletion  
292 of the *CDC55* gene in the laboratory strain BY4741 (Fig. 5A). In contrast, the level of  
293 glyceraldehyde 3-phosphate (G3P) accumulated in *cdc55* $\Delta$  cells was 3-fold higher than  
294 that in wild-type cells, while the intracellular pools of 3-phosphoglyceric acid (3PG) and  
295 the ensuing glycolytic intermediates were smaller in *cdc55* $\Delta$  cells. These data suggest that,  
296 at 6 h, the metabolic steps between G3P and 3PG are specifically compromised by  
297 deletion of the *CDC55* gene. We noted that 1,3-bisphosphoglyceric acid (1,3BPG), an

298 intermediate between G3P and 3PG in the glycolytic pathway, was not detected in both  
299 wild-type and *cdc55*Δ cells in the present analysis. At 1 d, similar accumulations were  
300 observed for F6P and phosphoenolpyruvic acid (PEP) in *cdc55*Δ cells (Fig. 5B); the  
301 accumulation of F6P remained even at 2 d (Fig. 5C). These data suggested that, at 1 - 2 d,  
302 the metabolic steps between F6P and F1,6BP, and between PEP and pyruvic acid, are  
303 disturbed by deletion of the *CDC55* gene. In the sake strain K701 at 1 d from the onset of  
304 alcoholic fermentation, the accumulations of F6P and PEP were observed in  
305 *CDC55*<sup>WT</sup>-deficient cells (*cdc55*<sup>WT</sup>Δ/*cdc55*<sup>MT</sup>) (Fig. 5D), consistent with the results  
306 obtained using laboratory yeast cells. Based on these results, it is possible to hypothesize  
307 that the enzymatic activities of phosphofructokinase (F6P to F1,6BP) and/or pyruvate  
308 kinase (PEP to pyruvic acid) are negatively affected by the loss of PP2A<sup>B55δ</sup> function both  
309 in laboratory and sake strains, when the fermentation rates reach their maxima.

310

## 311 **DISCUSSION**

312 Although the genes and enzymes of the glycolysis and alcoholic fermentation pathways  
313 have been thoroughly studied in *S. cerevisiae*, the mechanisms by which intracellular  
314 signaling pathways regulate carbohydrate metabolism in response to extracellular cues  
315 are still not fully elucidated. We previously identified a loss-of-function mutation in the  
316 *RIM15* gene (*rim15*<sup>5054\_5055insA</sup>) that is present in K7 and shared among the associated  
317 sake yeast strains, indicating that this mutation is associated with enhanced fermentation  
318 performance (5, 7). In the present work, we showed that sake yeast cells exhibit elevated  
319 TORC1 activity during alcoholic fermentation in comparison to laboratory strains.  
320 TORC1 upregulates the Sfp1p-targeted genes encoding ribosome-associated proteins and

321 downregulates members of the NCR and GAAC regulons in a Rim15p-independent  
322 manner (27). These attributes (Fig. 1), as well as the observed defect in induction of the  
323 Msn2/4p-mediated stress-response genes (3), suggest enhanced activation of TORC1 in  
324 sake yeast cells (compared to laboratory strains). The high level of phosphorylated  
325 Thr737 of Sch9p observed in sake yeast cells (Fig. S2) is consistent with this idea. As  
326 previously reported, TORC1 activity is not fully attenuated in K7 cells even under  
327 nitrogen limitation (34). Therefore, elevated TORC1 activity can be regarded as a novel  
328 hallmark of the sake yeast cells. In general, nutritional limitation and environmental  
329 stresses rapidly inactivate TORC1 in yeast, resulting in inhibition of cell growth and  
330 proliferation. We postulate that the maintenance of high TORC1 activity in sake yeast  
331 cells may facilitate cellular metabolic activity even under fermentative conditions.  
332 Among the components of TORC1, only Tor1p contains missense mutations (R167Q and  
333 T1456I) in K7 and its relatives. Further studies will be needed to evaluate the roles of the  
334 mutations in *TOR1* and those in other genes to be discovered in sake yeast strains.

335 In the present study, we demonstrated that the conserved  
336 TORC1-Greatwall-PP2A<sup>B55δ</sup> pathway is key to the control of alcoholic fermentation (Fig.  
337 6A). In *S. cerevisiae* laboratory strains and *S. pombe*, altered TORC1 activities led to  
338 changes in fermentation performance, specifically at the early stage of alcoholic  
339 fermentation. However, in laboratory yeast cells deficient for Greatwall, the initial rate of  
340 alcoholic fermentation was maintained and not affected by changes in TORC1. In  
341 contrast, in PP2A<sup>B55δ</sup>-deficient laboratory yeast cells, the fermentation rate was strikingly  
342 low and not enhanced even by a loss of Greatwall or ENSA. The observed strong  
343 epistasis suggested that the Greatwall-PP2A<sup>B55δ</sup> pathway, among numerous downstream



344 effector proteins of TORC1, is the primary mediator of fermentation control. This  
345 epistasis also indicated that PP2A<sup>B55δ</sup> is the major regulator of the alcoholic fermentation  
346 machinery.

347 In our hypothesis, both high TORC1 activity and loss of Rim15p contribute to  
348 the activation of PP2A<sup>B55δ</sup> and the subsequent enhancement of the cellular fermentation  
349 performance in the K7-related sake strains (Fig. 6B). Indeed, neither impairment of  
350 TORC1 nor recovery of Rim15p is sufficient to attenuate PP2A<sup>B55δ</sup> activity in these cells.  
351 Presumably, even if TORC1 activity is decreased, the change in TORC1 signaling may  
352 not be conveyed downstream due to the loss of Rim15p (Fig. S1). On the other hand, if a  
353 functional *RIM15* gene is restored, the hyperactivated TORC1 can inhibit the functions of  
354 Rim15p, resulting in elevated PP2A<sup>B55δ</sup> activity. Our data indicated that the high  
355 fermentation performance of sake yeast cells was abrogated only when the functional  
356 *CDC55* (B55δ-encoding) gene was disrupted (Fig. 3R). Consequently, the two changes  
357 (in TORC1 and Rim15p) observed in the TORC1-Greatwall-PP2A<sup>B55δ</sup> pathway of sake  
358 yeast cells may mutually ensure the robust phenotype of these strains in the context of  
359 alcoholic fermentation.

360 Why do multiple sake yeast strains possess putative loss-of-function mutations  
361 (i.e., nonsense mutations and frameshift mutations; Fig. 4B) in the *CDC55* gene? Since  
362 diploid sake yeast strains contain two copies of the *CDC55* gene, heterozygosity for a  
363 loss-of-function mutation at the loci may not yield apparent effects on alcoholic  
364 fermentation. PP2A<sup>B55δ</sup> regulates not only carbohydrate metabolism but also cell cycle  
365 progression. In *S. cerevisiae*, PP2A<sup>B55δ</sup> is the key inhibitor of the entry into quiescence  
366 (G<sub>0</sub> phase). Loss of Rim15p decreases the expression of stress-response genes and

367 shortens chronological life span, and *cdc55* $\Delta$  is able to suppress such Rim15p-deficient  
368 phenotypes (24). The heterozygous loss-of-function mutations in *CDC55* in the sake  
369 strains may reduce the dosage of functional Cdc55p, thereby serving as weak suppressors  
370 of the long-term survival defect associated with the *rim15*<sup>5054\_5055insA</sup> mutation (Fig. S3).  
371 Another mutation in the functional *CDC55* allele or a loss of heterozygosity (LOH) may  
372 further enhance cell viability, although the lack of Cdc55p function severely impairs  
373 fermentation performance. Thus, the individual sake strains may have independently  
374 acquired and maintained the heterozygous *cdc55* mutations during decades of selection  
375 for enhanced fermentation. Based on our model, we propose that the *cdc55* mutations  
376 identified in the sake strains are potential fermentation inhibitors whose elimination could  
377 facilitate the development of genetically stable sake yeast strains.

378         Comparison of the glycolytic intermediate pools between wild-type and *cdc55* $\Delta$   
379 cells suggested that the loss of PP2A<sup>B55 $\delta$</sup>  negatively affects the metabolic reactions  
380 responsible for the conversion of (i) F6P to F1,6BP, (ii) G3P to 3PG, and (iii) PEP to  
381 pyruvic acid during the initial stage of alcoholic fermentation (Fig. 5). We presume that  
382 these defects are at least partially responsible for the low fermentation performance of  
383 *cdc55* $\Delta$  cells. Intriguingly, PP2A<sup>B55 $\delta$</sup>  appears to control individual glycolytic reactions in  
384 a fermentation-phase-specific manner; only the defect in (ii) was observed at 6 h from the  
385 onset of alcoholic fermentation in a laboratory strain, whereas the defects of (i) and/or  
386 (iii) were observed from 1 d to 2 d. Thus, these results imply that the activities of  
387 glycolytic enzymes are separately regulated during alcoholic fermentation, and that the  
388 pleiotropic functions of PP2A<sup>B55 $\delta$</sup>  contribute to the optimal glycolytic flux. Among the  
389 glycolytic enzymes, phosphofructokinase and pyruvate kinase catalyze irreversible and

390 rate-limiting reactions, (i) and (iii), respectively, in glycolysis. Recent integrated  
391 phosphoproteomics data in budding yeast indicate that Pfk1p and Pfk2p (the  $\alpha$  and  $\beta$   
392 subunits of phosphofructokinase, respectively) and Cdc19p (the main pyruvate kinase  
393 isozyme) form phosphorylation hubs, suggesting that multiple protein kinases  
394 phosphorylate these enzymes to modulate their activity, intracellular localization, or  
395 protein degradation (32, 33). For example, it has been reported that phosphorylation of  
396 residue Ser163 of Pfk2p inhibits the phosphofructokinase activity *in vivo* under  
397 gluconeogenic conditions (35). The protein phosphatase activity of PP2A<sup>B55 $\delta$</sup>  may  
398 directly regulate glycolytic enzymes by counteracting such inhibitory phosphorylation. In  
399 fact, Pfk1p and Pfk2p are listed as putative PP2A<sup>B55 $\delta$</sup> -dephosphorylated proteins (31).  
400 The 3PG kinase Pfk1p, which is involved in reaction (ii), also is a putative PP2A<sup>B55 $\delta$</sup>   
401 target. The phosphorylation status and the activities of the candidate enzymes should be  
402 compared between wild-type and *cdc55* $\Delta$  cells during alcoholic fermentation. Since the  
403 glycolytic pathway and the posttranslational modifications of the glycolytic enzymes are  
404 often conserved evolutionarily, our study may also offer clues to identify novel key  
405 mechanisms of protein phosphorylation-mediated glycolytic control by the  
406 TORC1-Greatwall-PP2A<sup>B55 $\delta$</sup>  pathway.

407

## 408 MATERIALS AND METHODS

409 **Yeast strains.** The yeast strains used in this study are listed in Table S1. *Saccharomyces*  
410 *cerevisiae* laboratory strain BY4741 and its single-deletion mutants were obtained from  
411 Euroscarf (Germany). Another *S. cerevisiae* laboratory strain X2180 and  
412 *Schizosaccharomyces pombe* wild-type strain 972 were obtained from the American Type

413 Culture Collection (ATCC, USA). Sake yeast strains Kyokai no. 7 (K7) and its relatives  
414 (K6, K601, K701, K9, K901, K10, K1001, K11, K12, K13, K14, K1401, K1501, K1601,  
415 K1701, and K1801) were provided by the Brewing Society of Japan (BSJ, Japan). *S.*  
416 *pombe* strain ED666 *cek1Δ::kanMX* (*h<sup>+</sup> ade6-M210 ura4-D18 leu1-32 cek1Δ::kanMX*)  
417 was obtained from Bioneer (Korea).

418 Disruption of the *IGO2* gene in BY4741 *igo1Δ* was performed using a  
419 PCR-based method (36) with a gene-specific primer pair and plasmid pFA6a-hphNT (37)  
420 as the template to generate BY4741 *igo1Δ::kanMX igo2Δ::hphNT* (*igo1/2Δ*). Disruption  
421 of the *CDC55* gene in BY4741 wild type, BY4741 *rim15Δ* and BY4741 *igo1/2Δ* was  
422 performed using a PCR-based method (36) with a gene-specific primer pair and plasmid  
423 pFA6a-natNT (37) as the template to generate BY4741 *cdc55Δ::natNT* (*cdc55Δ*),  
424 BY4741 *cdc55Δ::natNT rim15Δ::kanMX* (*cdc55Δ rim15Δ*), and BY4741 *cdc55Δ::natNT*  
425 *igo1Δ::kanMX igo2Δ::hphNT* (*cdc55Δ igo1/2Δ*), respectively.

426 The *TOR1*<sup>L2134M</sup> mutation was previously reported as a hyperactive point  
427 mutation in the kinase domain of Tor1p (28). Since the mutation site was conserved in the  
428 *TOR2* gene, the corresponding mutation was also introduced to generate *TOR2*<sup>L2138M</sup>.  
429 Disruption of the *RIM15*, *GTR1*, *GTR2*, and *SCH9* genes in TM142 wild type or in  
430 TM142 *TOR1*<sup>L2134M</sup> was performed using a PCR-based method (36) with a gene-specific  
431 primer pair and plasmid pFA6a-kanMX (37) as the template to generate TM142  
432 *rim15Δ::kanMX* (*rim15Δ*), TM142 *TOR1*<sup>L2134M</sup> *rim15Δ::kanMX* (*TOR1*<sup>L2134M</sup> *rim15Δ*),  
433 TM142 *gtr1Δ::kanMX* (*gtr1Δ*), TM142 *gtr2Δ::kanMX* (*gtr2Δ*), and TM142  
434 *sch9Δ::kanMX* (*sch9Δ*), respectively.

435 Heterozygous disruption of the *CDC55* gene in K701 was performed using a

436 PCR-based method (36) with a gene-specific primer pair and plasmid pFA6a-natNT (37)  
437 as the template. Correct disruption of the *CDC55*<sup>WT</sup> or *cdc55*<sup>MT</sup> allele was confirmed by  
438 genomic PCR and direct DNA sequencing of the PCR product. Homozygous disruption  
439 of the *SCH9* gene in IB1401 was performed according to a previous report (32). To  
440 overexpress 3HA-tagged Sch9p from a glycolytic gene promoter in IB1401, plasmid  
441 p416-3HA-SCH9 (kindly gifted from Prof. Kevin Morano from the University of Texas,  
442 USA) was introduced into IB1401.

443 Disruption of the *ppk18*<sup>+</sup> and *igo1*<sup>+</sup> genes in 972 wild type was performed using  
444 a PCR-based method (36) with a gene-specific primer pair and plasmid pFA6a-kanMX  
445 (37) as the template to generate 972 *ppk18Δ::kanMX* and 972 *igo1Δ::kanMX* (*igo1Δ*),  
446 respectively. The *kanMX* genes in ED666 *cek1Δ::kanMX* and 972 *ppk18Δ::kanMX* were  
447 replaced with *natMX* and *hphMX*, respectively, using a one-step marker switch (38) to  
448 generate ED666 *cek1Δ::natMX* and 972 *ppk18Δ::hphMX*, respectively. Both strains were  
449 mated and sporulated to generate the prototrophic double mutant *cek1Δ::natMX*  
450 *ppk18Δ::hphMX* (*cek1Δ ppk18Δ*). To construct the prototrophic mutants *sck1Δ::his7*<sup>+</sup>  
451 *sck2Δ::ura4*<sup>+</sup> (*sck1Δ sck2Δ*), *ppa1Δ::ura4*<sup>+</sup> (*ppa1Δ*), *ppa2Δ::ura4*<sup>+</sup> (*ppa2Δ*), and  
452 *pab1Δ::ura4*<sup>+</sup> (*pab1Δ*), a suitable wild-type strain was mated with JX766 (39), MY1121,  
453 MY1122 (40), and MY7214 (41), respectively, and sporulated. The *pab1Δ* and *igo1Δ*  
454 strains were mated and sporulated to generate the prototrophic double mutant  
455 *pab1Δ::ura4*<sup>+</sup> *igo1Δ::kanMX* (*pab1Δ igo1Δ*).

456 Yeast cells were routinely grown in liquid YPD medium (1% yeast extract, 2%  
457 peptone, and 2% glucose) at 30°C, unless stated otherwise.

458 **Sequencing of the *CDC55* gene.** To analyze the *CDC55* sequence, the gene was

459 amplified by PCR with the primer pair CDC55-(-150)-F (5'-GGC AGC TTA ATA  
460 CGA TTA CCC C-3') and CDC55-(+1906)-R (5'-TGG TGA AGT GAT  
461 GAA AGA AGT CC-3'), using genomic DNA from the strain of interest as the  
462 template. The PCR product was sequenced directly using a BigDye terminator v3.1 cycle  
463 sequencing kit (Thermo Fisher Scientific) and primers CDC55-seq2 (5'-TCG AGG  
464 TCA AAC TGG AGA GA-3'), CDC55-seq3 (5'-AAA ATC ATT GCT  
465 GCC ACC CC-3'), and CDC55-seq4 (5'-TGA TAC CTA TGA AAA CGA  
466 TGC GA-3') on a 3130xl Genetic Analyzer (Applied Biosystems); sequencing was  
467 performed at Fasmac Co., Ltd. (Japan).

468 **Fermentation tests.** For measurements of fermentation rates, yeast cells were  
469 precultured in YPD medium at 30°C overnight, inoculated into 50 mL of YPD20 medium  
470 (1% yeast extract, 2% peptone, and 20% glucose) for *S. cerevisiae* or YPD10 medium  
471 (1% yeast extract, 2% peptone, and 10% glucose) for *S. pombe* at a final optical density at  
472 a wavelength of 600 nm (OD<sub>600</sub>) of 0.1, and then further incubated at 30°C without  
473 shaking. Fermentation progression was continuously monitored by measuring the volume  
474 of evolved carbon dioxide gas using a Fermograph II apparatus (Atto) (42).

475 **Analysis of intracellular metabolite profiles.** During the fermentation tests in  
476 YPD20 medium, yeast cells corresponding to an OD<sub>600</sub> of 20 were collected at 6 h, 1 d, or  
477 2 d from the onset of the fermentation tests. All pretreatment procedures for the samples  
478 were performed according to the protocols provided by Human Metabolic Technologies,  
479 Inc. Briefly, each sample of yeast cells was washed twice with 1 mL ice-cold Milli-Q  
480 water, suspended in 1.6 mL methanol containing 5 µM internal standard solution 1  
481 (Human Metabolic Technologies), and then sonicated for 30 s at room temperature.

482 Cationic compounds were measured in the positive mode of CE-TOFMS, and anionic  
483 compounds were measured in the positive and negative modes of CE-MS/MS (43). Peaks  
484 detected by CE-TOFMS and CE-MS/MS were extracted using automatic integration  
485 software (MasterHands, Keio University (44) and MassHunter Quantitative Analysis  
486 B.06.00, Agilent Technologies, respectively) to obtain peak information, including  $m/z$ ,  
487 migration time, and peak area. The peaks were annotated with putative metabolites from  
488 the HMT metabolite database (Human Metabolic Technologies) based on their migration  
489 times in CE and  $m/z$  values as determined by TOFMS and MS/MS. Metabolite  
490 concentrations were calculated by normalizing the peak area of each metabolite with  
491 respect to the area of the internal standard and by using standard curves, which were  
492 obtained from three-point calibrations.

493

#### 494 **ACKNOWLEDGEMENTS**

495 The Japan Society for the Promotion of Science (JSPS) provided funding to DW under  
496 grant number 16K18676, to SI under grant number 17H03795, and to TM under grant  
497 numbers 25291042 and 17H03802. The Public Foundation of Elizabeth Arnold-Fuji  
498 provided funding to DW. The Foundation for the Nara Institute of Science and  
499 Technology provided funding to DW. The authors declare no conflicts of interest.

500    **REFERENCES**

- 501    1.   Kitagaki H, Kitamoto K. 2013. Breeding research on sake yeasts in Japan: history,  
502        recent technological advances, and future perspectives. *Annu Rev Food Sci Technol*  
503        4:215–235.
- 504    2.   Ohnuki S, Okada H, Friedrich A, Kanno Y, Goshima T, Hasuda H, Inahashi M,  
505        Okazaki N, Tamura H, Nakamura R, Hirata D, Fukuda H, Shimoi H, Kitamoto K,  
506        Watanabe D, Schacherer J, Akao T, Ohya Y. 2017. Phenotypic diagnosis of lineage  
507        and differentiation during sake yeast breeding. *G3 (Bethesda)* 7:2807–2820.
- 508    3.   Watanabe D, Wu H, Noguchi C, Zhou Y, Akao T, Shimoi H. 2011. Enhancement of  
509        the initial rate of ethanol fermentation due to dysfunction of yeast stress response  
510        components Msn2p and/or Msn4p. *Appl Environ Microbiol* 77:934–941.
- 511    4.   Akao T, Yashiro I, Hosoyama A, Kitagaki H, Horikawa H, Watanabe D, Akada R,  
512        Ando Y, Harashima S, Inoue T, Inoue Y, Kajiwara S, Kitamoto K, Kitamoto N,  
513        Kobayashi O, Kuhara S, Masubuchi T, Mizoguchi H, Nakao Y, Nakazato A, Namise  
514        M, Oba T, Ogata T, Ohta A, Sato M, Shibasaki S, Takatsume Y, Tanimoto S, Tsuboi  
515        H, Nishimura A, Yoda K, Ishikawa T, Iwashita K, Fujita N, Shimoi H. 2011.  
516        Whole-genome sequencing of sake yeast *Saccharomyces cerevisiae* Kyokai no. 7.  
517        *DNA Res* 18:423–434.
- 518    5.   Watanabe D, Araki Y, Zhou Y, Maeya N, Akao T, Shimoi H. 2012. A loss-of-function  
519        mutation in the PAS kinase Rim15p is related to defective quiescence entry and high  
520        fermentation rates of *Saccharomyces cerevisiae* sake yeast strains. *Appl Environ*  
521        *Microbiol* 78:4008–4016.
- 522    6.   Inai T, Watanabe D, Zhou Y, Fukada R, Akao T, Shima J, Takagi H, Shimoi H. 2013.



- 523 Rim15p-mediated regulation of sucrose utilization during molasses fermentation  
524 using *Saccharomyces cerevisiae* strain PE-2. J Biosci Bioeng 116:591–594.
- 525 7. Watanabe D, Zhou Y, Hirata A, Sugimoto Y, Takagi K, Akao T, Ohya Y, Takagi H,  
526 Shimoi H. 2016. Inhibitory role of Greatwall-like protein kinase Rim15p in alcoholic  
527 fermentation via upregulating the UDP-glucose synthesis pathway in *Saccharomyces*  
528 *cerevisiae*. Appl Environ Microbiol 82:340–351.
- 529 8. Oomuro M, Kato T, Zhou Y, Watanabe D, Motoyama Y, Yamagishi H, Akao T,  
530 Aizawa M. 2016. Defective quiescence entry promotes the fermentation performance  
531 of bottom-fermenting brewer's yeast. J Biosci Bioeng 122:577–582.
- 532 9. Watanabe D, Kaneko A, Sugimoto Y, Ohnuki S, Takagi H, Ohya Y. 2017. Promoter  
533 engineering of the *Saccharomyces cerevisiae* *RIM15* gene for improvement of  
534 alcoholic fermentation rates under stress conditions. J Biosci Bioeng 123:183–189.
- 535 10. Pedruzzi I, Dubouloz F, Cameroni E, Wanke V, Roosen J, Winderickx J, De Virgilio  
536 C. 2003. TOR and PKA signaling pathways converge on the protein kinase Rim15 to  
537 control entry into G<sub>0</sub>. Mol Cell 12:1607–1613.
- 538 11. Wanke V, Pedruzzi I, Cameroni E, Dubouloz F, De Virgilio C. 2005. Regulation of  
539 G<sub>0</sub> entry by the Pho80-Pho85 cyclin-CDK complex. EMBO J 24:4271–4278.
- 540 12. Panchaud N, Péli-Gulli MP, De Virgilio C. 2013. Amino acid deprivation inhibits  
541 TORC1 through a GTPase-activating protein complex for the Rag family GTPase  
542 Gtr1. Sci Signal 6:ra42.
- 543 13. Nicastro R, Sardu A, Panchaud N, De Virgilio C. 2017. The architecture of the Rag  
544 GTPase signaling network. Biomolecules 7:48.
- 545 14. Tatebe H, Shiozaki K. 2017. Evolutionary conservation of the components in the

- 546 TOR signaling pathways. *Biomolecules* 7:77.
- 547 15. Urban J, Soulard A, Huber A, Lippman S, Mukhopadhyay D, Deloche O, Wanke V,  
548 Anrather D, Ammerer G, Riezman H, Broach JR, De Virgilio C, Hall MN, Loewith R.  
549 2007. Sch9 is a major target of TORC1 in *Saccharomyces cerevisiae*. *Mol Cell*  
550 26:663–674.
- 551 16. Wanke V, Cameroni E, Uotila A, Piccolis M, Urban J, Loewith R, De Virgilio C.  
552 2008. Caffeine extends yeast lifespan by targeting TORC1. *Mol Microbiol* 69:277–  
553 285.
- 554 17. Chica N, Rozalén AE, Pérez-Hidalgo L, Rubio A, Novak B, Moreno S. 2016.  
555 Nutritional control of cell size by the greatwall-endosulfine-PP2A-B55 pathway.  
556 *Curr Biol* 26:319–330.
- 557 18. Düvel K, Yecies JL, Menon S, Raman P, Lipovsky AI, Souza AL, Triantafellow E,  
558 Ma Q, Gorski R, Cleaver S, Vander Heiden MG, MacKeigan JP, Finan PM, Clish CB,  
559 Murphy LO, Manning BD. 2010. Activation of a metabolic gene regulatory network  
560 downstream of mTOR complex 1. *Mol Cell* 39:171–183.
- 561 19. Cameroni E, Hulo N, Roosen J, Winderickx J, De Virgilio C. 2004. The novel yeast  
562 PAS kinase Rim15 orchestrates G<sub>0</sub>-associated antioxidant defense mechanisms. *Cell*  
563 *Cycle* 3:462–468.
- 564 20. Lee P, Kim MS, Paik SM, Choi SH, Cho BR, Hahn JS. 2013. Rim15-dependent  
565 activation of Hsf1 and Msn2/4 transcription factors by direct phosphorylation in  
566 *Saccharomyces cerevisiae*. *FEBS Lett* 587:3648–3655.
- 567 21. Yu J, Fleming SL, Williams B, Williams EV, Li Z, Somma P, Rieder CL, Goldberg  
568 ML. 2004. Greatwall kinase: a nuclear protein required for proper chromosome

- 569 condensation and mitotic progression in *Drosophila*. *J Cell Biol* 164:487–492.
- 570 22. Mochida S, Maslen SL, Skehel M, Hunt T. 2010. Greatwall phosphorylates an  
571 inhibitor of protein phosphatase 2A that is essential for mitosis. *Science* 330:1670–  
572 1673.
- 573 23. Gharbi-Ayachi A, Labbé JC, Burgess A, Vigneron S, Strub JM, Brioudes E,  
574 Van-Dorsselaer A, Castro A, Lorca T. 2010. The substrate of Greatwall kinase,  
575 Arpp19, controls mitosis by inhibiting protein phosphatase 2A. *Science* 330:1673–  
576 1677.
- 577 24. Bontron S, Jaquenoud M, Vaga S, Talarek N, Bodenmiller B, Aebersold R, De  
578 Virgilio C. 2013. Yeast endosulfines control entry into quiescence and chronological  
579 life span by inhibiting protein phosphatase 2A. *Cell Rep* 3:16–22.
- 580 25. Moreno-Torres M, Jaquenoud M, De Virgilio C. 2015. TORC1 controls G<sub>1</sub>-S cell  
581 cycle transition in yeast via Mpk1 and the greatwall kinase pathway. *Nat Commun*  
582 6:8256.
- 583 26. Moreno-Torres M, Jaquenoud M, Péli-Gulli MP, Nicastro R, De Virgilio C. 2017.  
584 TORC1 coordinates the conversion of Sic1 from a target to an inhibitor of  
585 cyclin-CDK-Cks1. *Cell Discov* 3:17012.
- 586 27. Conrad M, Schothorst J, Kankipati HN, Van Zeebroeck G, Rubio-Teixeira M,  
587 Thevelein JM. 2014. Nutrient sensing and signaling in the yeast *Saccharomyces*  
588 *cerevisiae*. *FEMS Microbiol Rev.* 38:254–299.
- 589 28. Takahara T, Maeda T. 2012. Transient sequestration of TORC1 into stress granules  
590 during heat stress. *Mol Cell* 47:242–252.
- 591 29. Urano J, Sato T, Matsuo T, Otsubo Y, Yamamoto M, Tamanoi F. 2007. Point

- 592 mutations in TOR confer Rheb-independent growth in fission yeast and  
593 nutrient-independent mammalian TOR signaling in mammalian cells. *Proc Natl Acad*  
594 *Sci U S A* 104:3514–3519.
- 595 30. Ouchi K, Akiyama H, 1971. Non-foaming mutants of sake yeasts selection by cell  
596 agglutination method and by froth flotation method. *Agric Biol Chem* 35:1024–1032.
- 597 31. Baro B, Játiva S, Calabria I, Vinaixa J, Bech-Serra JJ, de LaTorre C, Rodrigues J,  
598 Hernáez ML, Gil C, Barceló-Batlloiri S, Larsen MR, Queralt E. 2018. SILAC-based  
599 phosphoproteomics reveals new PP2A-Cdc55-regulated processes in budding yeast.  
600 *Gigascience* 7:giy047.
- 601 32. Tripodi F, Nicastro R, Reghellin V, Coccetti P. 2015. Post-translational modifications  
602 on yeast carbon metabolism: Regulatory mechanisms beyond transcriptional control.  
603 *Biochim Biophys Acta* 1850:620–627.
- 604 33. Chen Y, Nielsen J. 2016. Flux control through protein phosphorylation in yeast.  
605 *FEMS Yeast Res* 16:fow096.
- 606 34. Nakazawa N, Sato A, Hosaka M. 2016. TORC1 activity is partially reduced under  
607 nitrogen starvation conditions in sake yeast *Kyokai no. 7, Saccharomyces cerevisiae*.  
608 *J Biosci Bioeng* 121:247–252.
- 609 35. Oliveira AP, Ludwig C, Picotti P, Kogadeeva M, Aebersold R, Sauer U. 2012.  
610 Regulation of yeast central metabolism by enzyme phosphorylation. *Mol Syst Biol*  
611 8:623.
- 612 36. Goldstein AL, McCusker JH. 1999. Three new dominant drug resistance cassettes for  
613 gene disruption in *Saccharomyces cerevisiae*. *Yeast* 15:1541–1553.
- 614 37. Janke C, Magiera MM, Rathfelder N, Taxis C, Reber S, Maekawa H,

- 615 Moreno-Borchart A, Doenges G, Schwob E, Schiebel E, Knop M. 2004. A versatile  
616 toolbox for PCR-based tagging of yeast genes: new fluorescent proteins, more  
617 markers and promoter substitution cassettes. *Yeast* 21:947–962.
- 618 38. Sato M, Dhut S, Toda T. 2005. New drug-resistant cassettes for gene disruption and  
619 epitope tagging in *Schizosaccharomyces pombe*. *Yeast* 22:583–591.
- 620 39. Fujita M, Yamamoto M. 1998. *S. pombe sck2<sup>+</sup>*, a second homologue of *S. cerevisiae*  
621 *SCH9* in fission yeast, encodes a putative protein kinase closely related to PKA in  
622 function. *Curr Genet* 33:248–254.
- 623 40. Kinoshita N, Ohkura H, Yanagida M. 1990. Distinct, essential roles of type 1 and 2A  
624 protein phosphatases in the control of the fission yeast cell division cycle. *Cell*  
625 63:405–415.
- 626 41. Kinoshita K, Nemoto T, Nabeshima K, Kondoh H, Niwa H, Yanagida M. 1996. The  
627 regulatory subunits of fission yeast protein phosphatase 2A (PP2A) affect cell  
628 morphogenesis, cell wall synthesis and cytokinesis. *Genes Cells* 1:29–45.
- 629 42. Watanabe D, Ota T, Nitta F, Akao T, Shimoi H. 2011. Automatic measurement of  
630 sake fermentation kinetics using a multi-channel gas monitor system. *J Biosci Bioeng*  
631 112:54–57.
- 632 43. Soga T, Heiger DN. 2000. Amino acid analysis by capillary electrophoresis  
633 electrospray ionization mass spectrometry. *Anal Chem* 72:1236–1241.
- 634 44. Sugimoto M, Wong DT, Hirayama A, Soga T, Tomita M. 2000. Capillary  
635 electrophoresis mass spectrometry-based saliva metabolomics identified oral, breast  
636 and pancreatic cancer-specific profiles. *Metabolomics* 6:78–95.
- 637 45. Tanigawa M, Maeda T. 2017. An *in vitro* TORC1 kinase assay that recapitulates the

- 638 Gtr-independent glutamine-responsive TORC1 activation mechanism on yeast  
639 vacuoles. *Mol Cell Biol* 37:e00075-17.
- 640 46. Kitamoto K, Oda K, Gomi K, Takahashi K. 1990. Construction of uracil and  
641 tryptophan auxotrophic mutants from sake yeasts by disruption of *URA3* and *TRP1*  
642 genes. *Agric Bio Chem* 54:2979–2987.
- 643 47. Nakazawa N, Abe K, Koshika Y, Iwano K. 2010. *Cln3* blocks *IME1* transcription and  
644 the Ime1-Ume6 interaction to cause the sporulation incompetence in a sake yeast,  
645 Kyokai no. 7. *J Biosci Bioeng* 110:1–7.
- 646 48. Chia KH, Fukuda T, Sofyantoro F, Matsuda T, Amai T, Shiozaki K. 2017. Regulator  
647 and GATOR1 complexes promote fission yeast growth by attenuating TOR complex  
648 1 through Rag GTPases. *Elife* 6:e30880.

649 **FIGURE LEGENDS**

650

651 **FIG 1** Gene expression profiles downstream of TORC1: Comparison between a  
652 laboratory strain and a sake strain during sake fermentation. (A) Expression profiles of  
653 the ribosome-associated genes under the control of Sfp1p. (B) Expression profiles of  
654 genes belonging to the NCR and GAAC regulons. Expression levels in a laboratory strain  
655 (X2180) and a sake strain (K701) are derived from our previous DNA microarray data (3)  
656 and are indicated by red and blue, respectively. TORC1, target-of-rapamycin complex 1;  
657 NCR, nitrogen catabolite repression; GAAC, general amino acid control.

658

659 **FIG 2** Effects of modification of the TORC1-Greatwall pathway on fermentation  
660 progression. Fermentation was monitored by measuring carbon dioxide emission. (A)  
661 Fermentation profiles of strain TM142 (wild type; gray) and its *rim15* $\Delta$  disruptant (red).  
662 (B) Fermentation profiles of strain TM142 in YPD20 medium in the absence (wild type,  
663 gray) or presence (red) of 1 nM rapamycin. (C to J) Fermentation profiles of strain  
664 TM142 (wild type; gray) and its *tor1* $\Delta$  (C), *TOR1*<sup>L2134M</sup> (D), *TOR2*<sup>L2138M</sup> (E), *gtr1* $\Delta$  (F),  
665 *gtr2* $\Delta$  (G), *npr2* $\Delta$  (H), *npr3* $\Delta$  (I), or *sch9* $\Delta$  (J) mutant (red). (K) Fermentation profiles of  
666 strain TM142 *rim15* $\Delta$  in YPD20 medium in the absence (*rim15* $\Delta$ ; gray) or presence (red)  
667 of 1 nM rapamycin. (L) Fermentation profiles of strain TM142 *rim15* $\Delta$  (*rim15* $\Delta$ ; gray)  
668 and its *TOR1*<sup>L2134M</sup> mutant (red). (M, N) Fermentation profiles of strain IB1401 (wild  
669 type; gray) and its *gtr1* $\Delta$ /*gtr1* $\Delta$ (M) or *sch9* $\Delta$ /*sch9* $\Delta$  (N) disruptant (blue). (O, P)  
670 Fermentation profiles of the wild-type *S. pombe* strain (wild type; gray) and its *tor2*<sup>E2221K</sup>  
671 (O) or *sck1/2* $\Delta$  (P) mutant (green). Fermentation tests were performed in YPD20 medium

672 (A to N) or in YPD10 medium (O, P) at 30°C for 5 d. Values represent the mean  $\pm$  SD of  
673 data from two or more independent experiments. \*, significantly different from the value  
674 for the control experiment ( $t$  test,  $P < 0.05$ ). Note that the experiments using laboratory,  
675 sake, and fission yeast strains are indicated in red, blue, and green, respectively. WT, wild  
676 type; Rap, rapamycin.

677

678 **FIG 3** Effects of modification of the Greatwall-PP2A<sup>B55 $\delta$</sup>  pathway on fermentation  
679 progression. Fermentation was monitored by measuring carbon dioxide emission. (A, B)  
680 Fermentation profiles of strain BY4741 (wild type; gray) and its *rim15* $\Delta$  (A) or *igo1/2* $\Delta$   
681 (B) disruptant (red). (C, D) Fermentation profiles of the wild-type *S. pombe* strain (wild  
682 type; gray) and its *cek1* $\Delta$ /*ppk18* $\Delta$  (C) or *igo1* $\Delta$  (D) disruptant (green). (E to I)  
683 Fermentation profiles of strain BY4741 (wild type; gray) and its *pph21* $\Delta$  (E), *pph22* $\Delta$  (F),  
684 *tpd3* $\Delta$  (G), *cdc55* $\Delta$  (H), or *rts1* $\Delta$  (I) disruptant (red). (J to L) Fermentation profiles of the  
685 wild-type *S. pombe* strain (wild type; gray) and its *ppa1* $\Delta$  (J), *ppa2* $\Delta$  (K) or *pab1* $\Delta$  (L)  
686 disruptant (green). (M, N) Fermentation profiles of strain BY4741 *cdc55* $\Delta$  (*cdc55* $\Delta$ ; gray)  
687 and its *rim15* $\Delta$  (M) or *igo1/2* $\Delta$  (N) disruptant (red). (O) Fermentation profiles of the *S.*  
688 *pombe pab1* $\Delta$  strain (*pab1* $\Delta$ ; gray) and its *igo1* $\Delta$  disruptant (green). (P) Fermentation  
689 profiles of strain K701 UT-1T with an empty vector (wild type; gray) and with a  
690 functional *RIM15*-expressing plasmid (blue). (Q, R) Fermentation profiles of strain K701  
691 (wild type; gray) and its *CDC55*<sup>WT</sup>/*cdc55*<sup>MT</sup> $\Delta$  (Q) or *cdc55*<sup>WT</sup> $\Delta$ /*cdc55*<sup>MT</sup> (N) disruptant  
692 (blue). Fermentation tests were performed in YPD20 medium (A, B, E to I, M, N, P to R)  
693 or in YPD10 medium (C, D, J to L, O) at 30°C for 5 d. Values represent the mean  $\pm$  SD of  
694 data from two or more independent experiments. \*, significantly different from the value



695 for the control experiment ( $t$  test,  $P < 0.05$ ). Note that the experiments using laboratory,  
696 sake, and fission yeast strains are indicated by red, blue, and green, respectively. WT,  
697 wild type.

698

699 **FIG 4** Heterozygous nonsense or frameshift mutations found in the *CDC55* genes of  
700 K7-related sake strains. (A) The *cdc55*<sup>1092delA</sup> (a.k.a. *cdc55*<sup>MT</sup>) mutation unique to K701.  
701 In this loss-of-function allele of K701, deletion of a single adenine nucleotide at ORF  
702 nucleotide 1092 causes a premature stop codon. (B) Mutation sites of the *CDC55* gene of  
703 K7-related sake strains. Nonsense and frameshift mutation sites are indicated by pink and  
704 orange dots, respectively. fs, frameshift.

705

706 **FIG 5** Effects of Cdc55p on glycolytic intermediate levels in the early stage of alcoholic  
707 fermentation. (A to C) Intracellular metabolite levels of laboratory strain BY4741 *cdc55* $\Delta$   
708 at 6 h (A), 1 d (B), and 2 d (C) from the onset of alcoholic fermentation; values are  
709 normalized to those of the BY4741 wild type at the respective time point. (D)  
710 Intracellular metabolite levels of sake strain K701 *cdc55*<sup>WT</sup> $\Delta$ /*cdc55*<sup>MT</sup> at 1 d from the  
711 onset of alcoholic fermentation; values are normalized to those of K701  
712 *CDC55*<sup>WT</sup>/*cdc55*<sup>MT</sup> $\Delta$ . Red and blue arrows indicate notable differences between adjacent  
713 metabolites. Data provided are from a single experiment representative of results from  
714 multiple independent fermentation tests. G6P, glucose 6-phosphate; F6P, fructose  
715 6-phosphate; F1,6BP, fructose 1,6-bisphosphate; DHAP, dihydroxyacetone phosphate;  
716 G3P, glyceraldehyde 3-phosphate; 3PG, 3-phosphoglyceric acid; 2PG, 2-phosphoglyceric  
717 acid; PEP, phosphoenolpyruvic acid; Pyr, pyruvic acid; n.d., not determined. Note that

718 G3P was not detected in K701 *cdc55<sup>WT</sup>Δ/cdc55<sup>MT</sup>*, and that 1,3-bisphosphoglyceric acid  
719 (1,3BPG) was not detected in any of the samples.

720

721 **FIG 6** A hypothetical model of the regulation of fermentation control by the  
722 TORC1-Greatwall-PP2A<sup>B55δ</sup> pathway. Orange and green colors indicate higher and lower  
723 activities, respectively, than those of *S. cerevisiae* wild-type laboratory strains. (A) In *S.*  
724 *cerevisiae* laboratory strains and *S. pombe*, changes in the activity of TORC1, Greatwall,  
725 or PP2A<sup>B55δ</sup> may lead to altered alcoholic fermentation performance. (B) In *S. cerevisiae*  
726 sake strains, both the high TORC1 activity and the loss of Rim15p may contribute to the  
727 constitutively high PP2A<sup>B55δ</sup> activity. Thus, PP2A<sup>B55δ</sup> must be disrupted to impair the  
728 fermentation performance in these strains.

## Fig. 1 (Watanabe *et al.*)

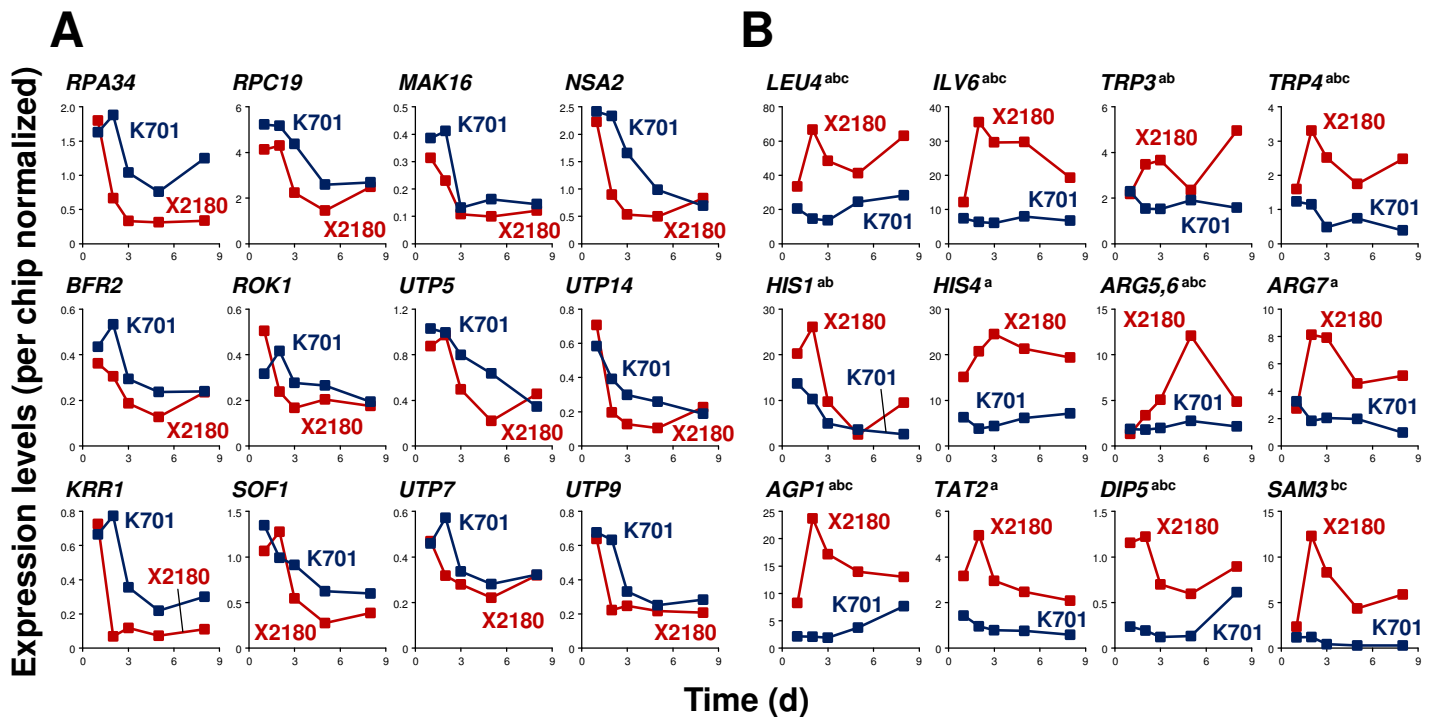

**FIG 1** Gene expression profiles downstream of TORC1: Comparison between a laboratory strain and a sake strain during sake fermentation. (A) Expression profiles of the ribosome-associated genes under the control of Sfp1p. (B) Expression profiles of genes belonging to the NCR and GAAC regulons. Expression levels in a laboratory strain (X2180) and a sake strain (K701) are derived from our previous DNA microarray data (3) and are indicated by red and blue, respectively. TORC1, target-of-rapamycin complex 1; NCR, nitrogen catabolite repression; GAAC, general amino acid control.

## Fig. 2 (Watanabe *et al.*)

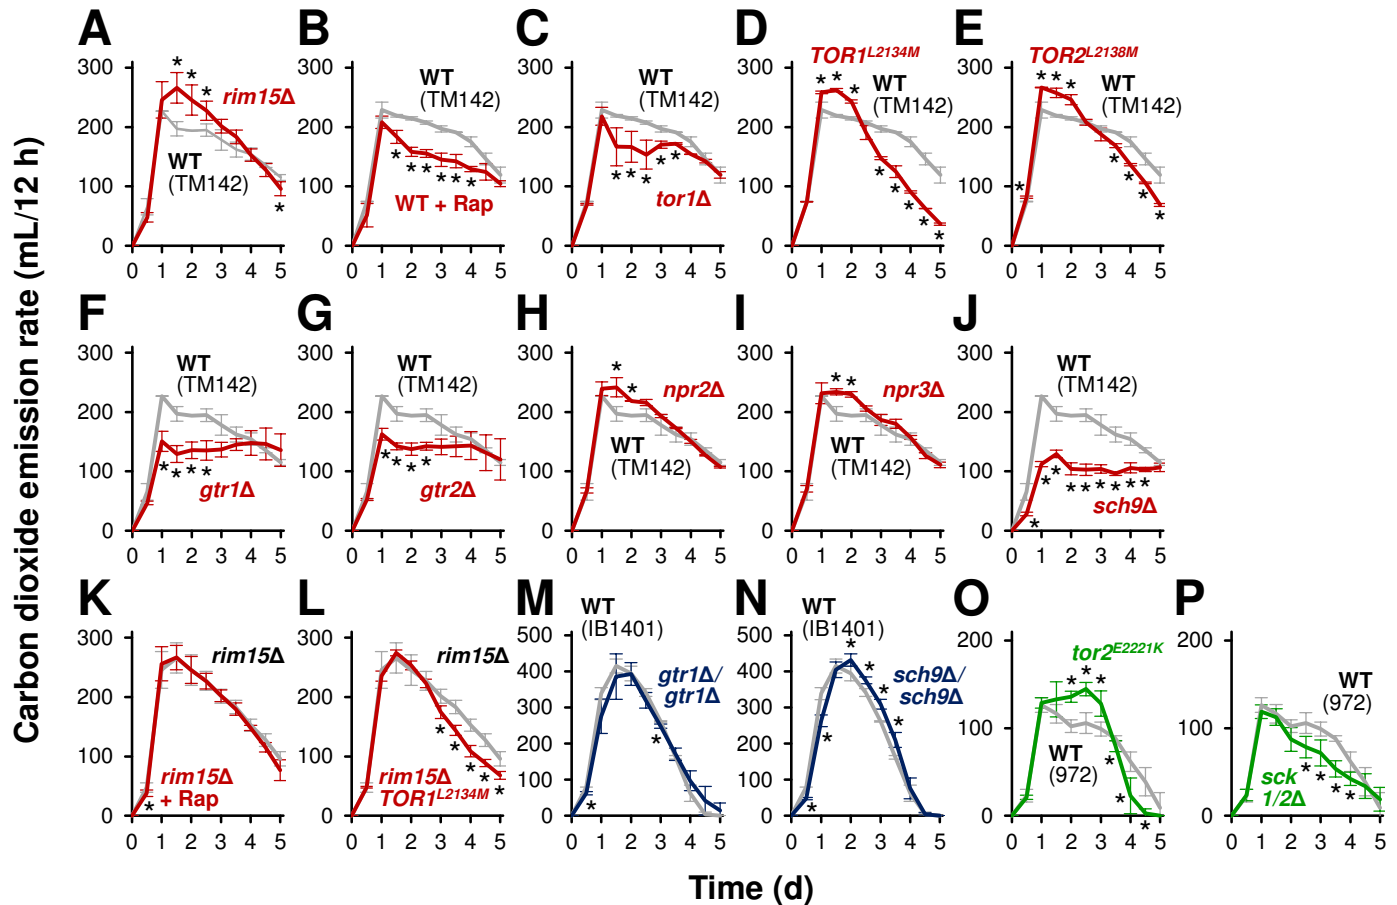

**FIG 2** Effects of modification of the TORC1-Greatwall pathway on fermentation progression. Fermentation was monitored by measuring carbon dioxide emission. (A) Fermentation profiles of strain TM142 (wild type; gray) and its *rim15Δ* disruptant (red). (B) Fermentation profiles of strain TM142 in YPD20 medium in the absence (wild type, gray) or presence (red) of 1 nM rapamycin. (C to J) Fermentation profiles of strain TM142 (wild type; gray) and its *tor1Δ* (C), *TOR1<sup>L2134M</sup>* (D), *TOR2<sup>L2138M</sup>* (E), *gtr1Δ* (F), *gtr2Δ* (G), *npr2Δ* (H), *npr3Δ* (I), or *sch9Δ* (J) mutant (red). (K) Fermentation profiles of strain TM142 *rim15Δ* in YPD20 medium in the absence (*rim15Δ*; gray) or presence (red) of 1 nM rapamycin. (L) Fermentation profiles of strain TM142 *rim15Δ* (*rim15Δ*; gray) and its *TOR1<sup>L2134M</sup>* mutant (red). (M, N) Fermentation profiles of strain IB1401 (wild type; gray) and its *gtr1Δ/gtr1Δ*(M) or *sch9Δ/sch9Δ* (N) disruptant (blue). (O, P) Fermentation profiles of the wild-type *S. pombe* strain (wild type; gray) and its *tor2<sup>E2221K</sup>* (O) or *sck1/2Δ* (P) mutant (green). Fermentation tests were performed in YPD20 medium (A to N) or in YPD10 medium (O, P) at 30° C for 5 d. Values represent the mean  $\pm$  SD of data from two or more independent experiments. \*, significantly different from the value for the control experiment (*t* test,  $P < 0.05$ ). Note that the experiments using laboratory, sake, and fission yeast strains are indicated in red, blue, and green, respectively. WT, wild type; Rap, rapamycin.

## Fig. 3 (Watanabe *et al.*)

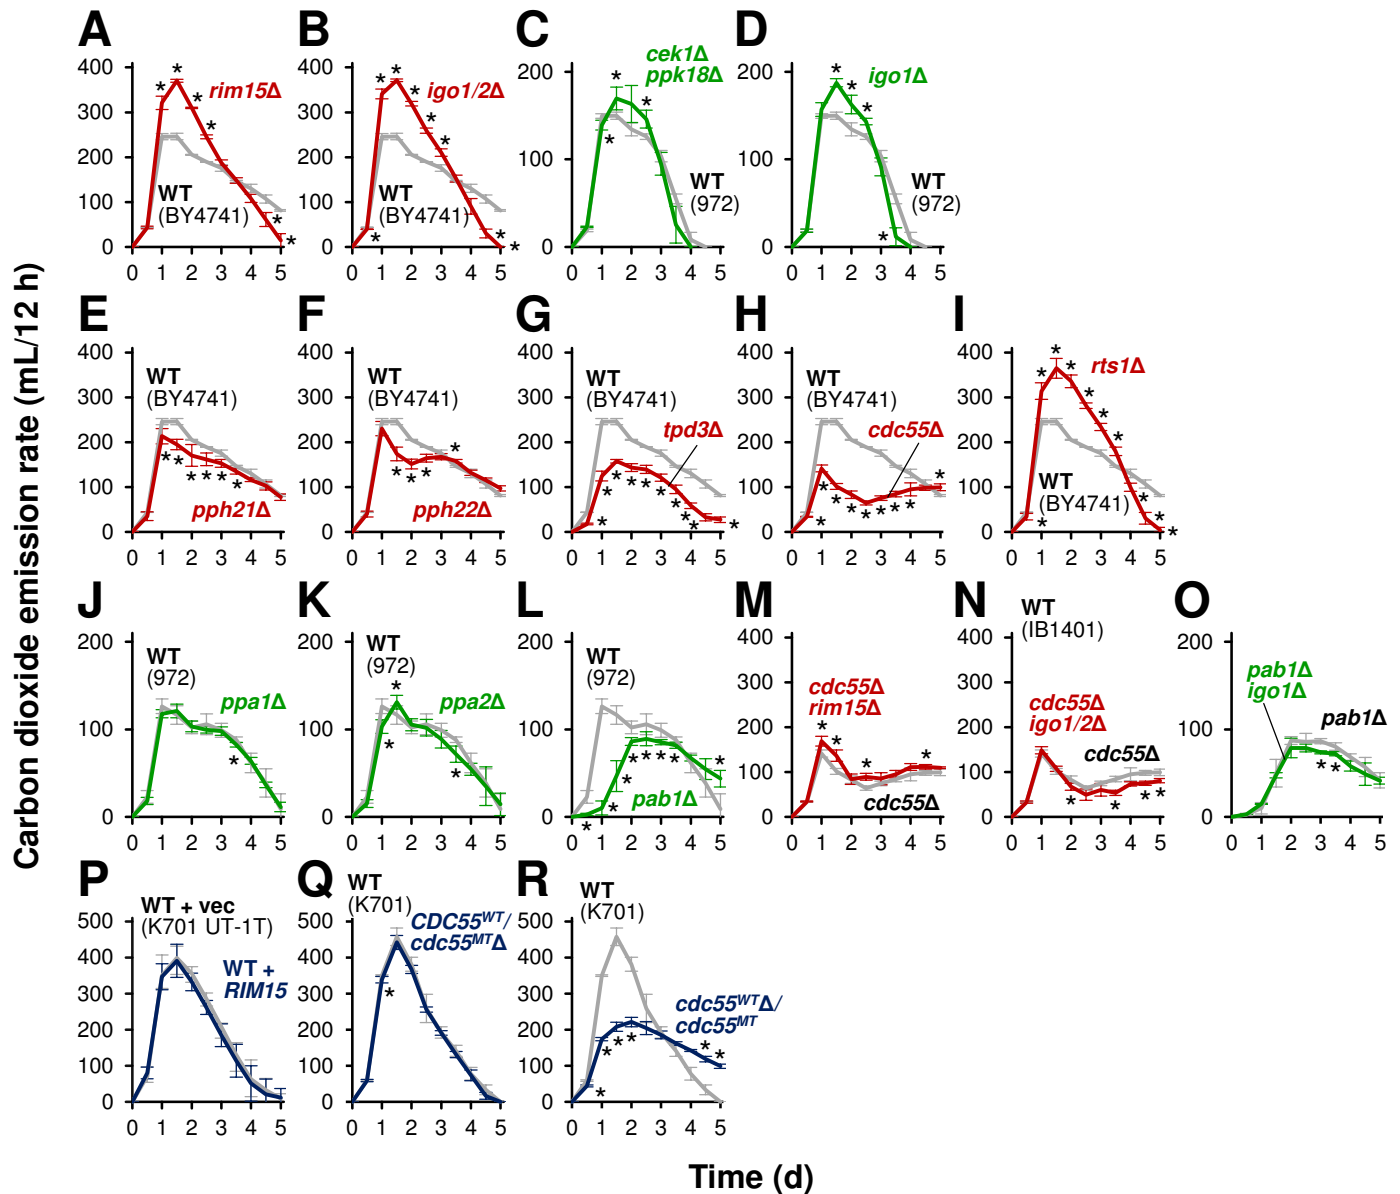

**FIG 3** Effects of modification of the Greatwall-PP2A<sup>B55δ</sup> pathway on fermentation progression. Fermentation was monitored by measuring carbon dioxide emission. (A, B) Fermentation profiles of strain BY4741 (wild type; gray) and its *rim15Δ* (A) or *igo1/2Δ* (B) disruptant (red). (C, D) Fermentation profiles of the wild-type *S. pombe* strain (wild type; gray) and its *cek1Δ/ppk18Δ* (C) or *igo1Δ* (D) disruptant (green). (E to I) Fermentation profiles of strain BY4741 (wild type; gray) and its *pph21Δ* (E), *pph22Δ* (F), *tpd3Δ* (G), *cdc55Δ* (H), or *rts1Δ* (I) disruptant (red). (J to L) Fermentation profiles of the wild-type *S. pombe* strain (wild type; gray) and its *ppa1Δ* (J), *ppa2Δ* (K) or *pab1Δ* (L) disruptant (green). (M, N) Fermentation profiles of strain BY4741 *cdc55Δ* (*cdc55Δ*; gray) and its *rim15Δ* (M) or *igo1/2Δ* (N) disruptant (red). (O) Fermentation profiles of the *S. pombe* *pab1Δ* strain (*pab1Δ*; gray) and its *igo1Δ* disruptant (green). (P) Fermentation profiles of strain K701 UT-1T with an empty vector (wild type; gray) and with a functional *RIM15*-expressing plasmid (blue). (Q, R) Fermentation profiles of strain K701 (wild type; gray) and its *CDC55*<sup>WT</sup>/*cdc55*<sup>MT</sup>Δ (Q) or *cdc55*<sup>WT</sup>Δ/*cdc55*<sup>MT</sup> (N) disruptant (blue). Fermentation tests were performed in YPD20 medium (A, B, E to I, M, N, P to R) or in YPD10 medium (C, D, J to L, O) at 30° C for 5 d. Values represent the mean ± SD of data from two or more independent experiments. \*, significantly different from the value for the control experiment (*t* test, *P* < 0.05). Note that the experiments using laboratory, sake, and fission yeast strains are indicated by red, blue, and green, respectively. WT, wild type.

## Fig. 4 (Watanabe *et al.*)

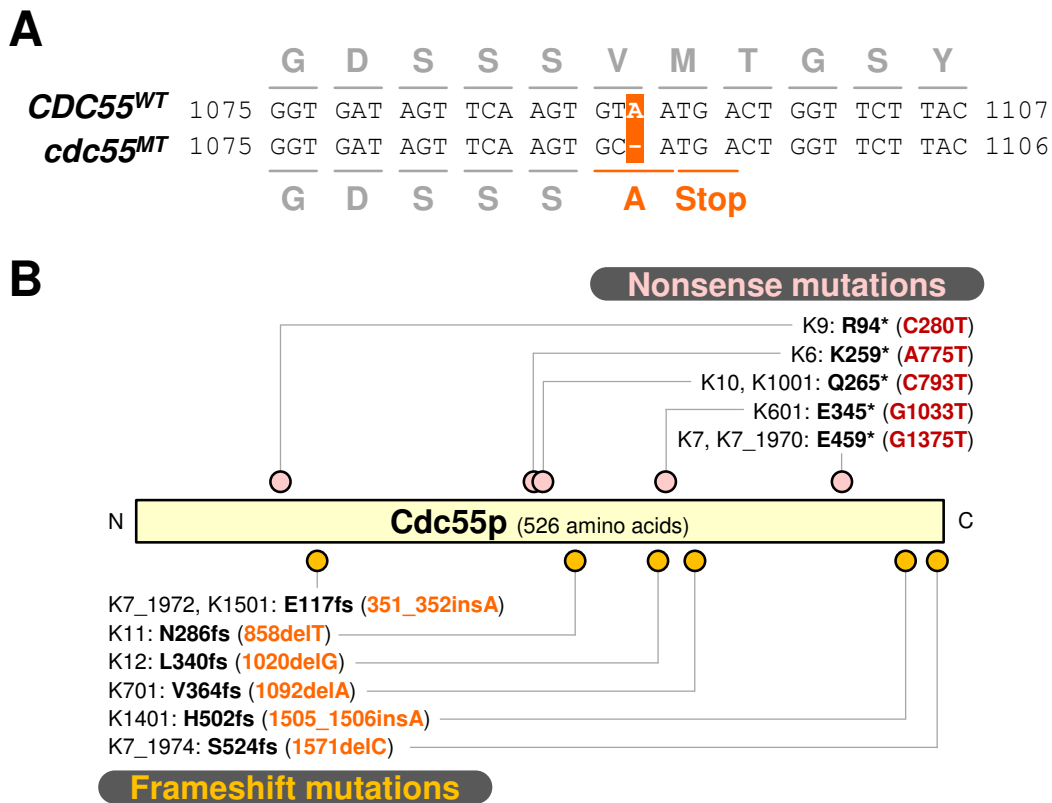

**FIG 4** Heterozygous nonsense or frameshift mutations found in the *CDC55* genes of K7-related sake strains. (A) The *cdc55<sup>1092delA</sup>* (a.k.a. *cdc55<sup>MT</sup>*) mutation unique to K701. In this loss-of-function allele of K701, deletion of a single adenine nucleotide at ORF nucleotide 1092 causes a premature stop codon. (B) Mutation sites of the *CDC55* gene of K7-related sake strains. Nonsense and frameshift mutation sites are indicated by pink and orange dots, respectively. fs, frameshift.

## Fig. 5 (Watanabe *et al.*)

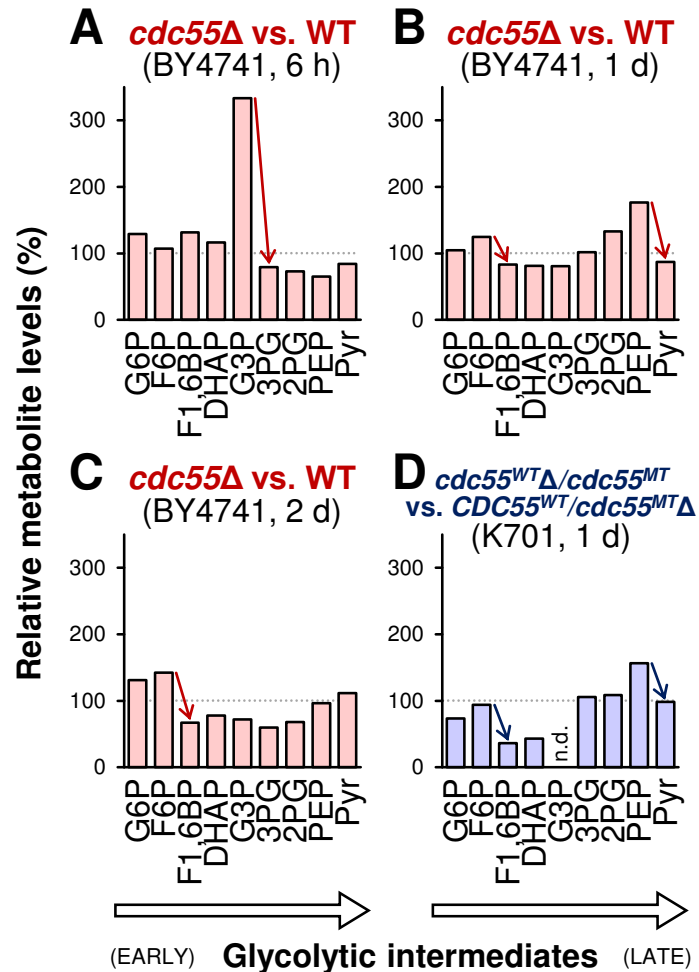

**FIG 5** Effects of Cdc55p on glycolytic intermediate levels in the early stage of alcoholic fermentation. (A to C) Intracellular metabolite levels of laboratory strain BY4741 *cdc55Δ* at 6 h (A), 1 d (B), and 2 d (C) from the onset of alcoholic fermentation; values are normalized to those of the BY4741 wild type at the respective time point. (D) Intracellular metabolite levels of sake strain K701 *cdc55<sup>WTΔ</sup>/cdc55<sup>MT</sup>* at 1 d from the onset of alcoholic fermentation; values are normalized to those of K701 *CDC55<sup>WT</sup>/cdc55<sup>MTΔ</sup>*. Red and blue arrows indicate notable differences between adjacent metabolites. Data provided are from a single experiment representative of results from multiple independent fermentation tests. G6P, glucose 6-phosphate; F6P, fructose 6-phosphate; F1,6BP, fructose 1,6-bisphosphate; DHAP, dihydroxyacetone phosphate; G3P, glyceraldehyde 3-phosphate; 3PG, 3-phosphoglyceric acid; 2PG, 2-phosphoglyceric acid; PEP, phosphoenolpyruvic acid; Pyr, pyruvic acid; n.d., not determined. Note that G3P was not detected in K701 *cdc55<sup>WTΔ</sup>/cdc55<sup>MT</sup>*, and that 1,3-bisphosphoglyceric acid (1,3BPG) was not detected in any of the samples.

## Fig. 6 (Watanabe *et al.*)

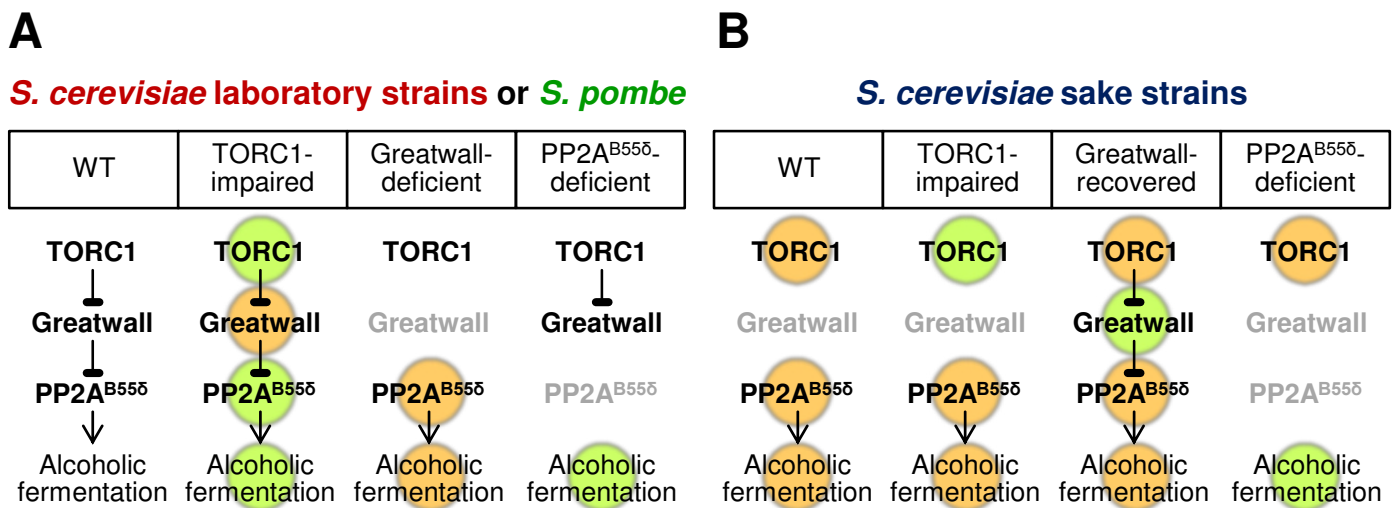

**FIG 6** A hypothetical model of the regulation of fermentation control by the TORC1-Greatwall-PP2A<sup>B55δ</sup> pathway. Orange and green colors indicate higher and lower activities, respectively, than those of *S. cerevisiae* wild-type laboratory strains. (A) In *S. cerevisiae* laboratory strains and *S. pombe*, changes in the activity of TORC1, Greatwall, or PP2A<sup>B55δ</sup> may lead to altered alcoholic fermentation performance. (B) In *S. cerevisiae* sake strains, both the high TORC1 activity and the loss of Rim15p may contribute to the constitutively high PP2A<sup>B55δ</sup> activity. Thus, PP2A<sup>B55δ</sup> must be disrupted to impair the fermentation performance in these strains.
